# Supplementary material for: A model-based analysis of physical and biological controls on ice algal and pelagic primary production in Resolute Passage
Source: Oxford University Press journal article supplement (doi:10.1525/elementa.229), 2017-01-01
Supplement: elementa-5-229-s3.pdf [file elementa-5-229-s3.pdf]

**Table S2. Parameters for the sea ice biogeochemical model.**

| Symbol                   | Description                                                                                           | Unit                                                 | Default value         | Reference                                |
|--------------------------|-------------------------------------------------------------------------------------------------------|------------------------------------------------------|-----------------------|------------------------------------------|
| $\alpha^{ia} / P_m^{ia}$ | Ratio of photosynthetic parameters (photosynthetic efficiency and maximum photosynthetic rate) for IA | $(\mu\text{mol photons m}^{-2} \text{ s}^{-1})^{-1}$ | 0.44                  | Within the range of Lavoie et al. (2005) |
| $b_{ia}$                 | Temperature sensitivity coefficient for ice algal growth                                              | $(^\circ\text{C})^{-1}$                              | 0.0633                | Lavoie et al. (2005)                     |
| $C_{ice}$                | Critical ice growth/melt rate                                                                         | $\text{m d}^{-1}$                                    | 0.015                 | Lavoie et al. (2005)                     |
| $C_{io}$                 | Drag coefficient at the ice-ocean interface                                                           | -                                                    | 0.0054                | Shirasawa and Ingram (1997)              |
| $D$                      | Molecular diffusivity for nutrients at the ice-water interface                                        | $\text{m}^2 \text{ s}^{-1}$                          | $0.47 \times 10^{-9}$ | Rebreanu et al. (2008)                   |
| $f_{lia}$                | Fraction of ice algae linear mortality that goes to $\text{NH}_4$                                     | -                                                    | 0.3                   | This study                               |
| $f_{seed}$               | Fraction of ice algae sloughing that contributes to P2 seeding                                        | -                                                    | 0.1                   | Lavoie et al. (2009)                     |
| $k_n$                    | Half-saturation constant for nitrogen uptake                                                          | $\text{mmol N m}^{-3}$                               | 1                     | Lavoie et al. (2005)                     |
| $k_s$                    | Half-saturation constant for silicon uptake                                                           | $\text{mmol Si m}^{-3}$                              | 4                     | Lavoie et al. (2005)                     |
| $m_{lia}$                | Rate constant for                                                                                     | $\text{d}^{-1}$                                      | 0.03                  | This study                               |

|                  |                                                |                                             |                       |                           |
|------------------|------------------------------------------------|---------------------------------------------|-----------------------|---------------------------|
|                  | ice algae linear mortality                     |                                             |                       |                           |
| $m_{qia}$        | Rate constant of ice algae quadratic mortality | $d^{-1} (\text{mmol N m}^{-3} d^{-1})^{-1}$ | 0.00015               | This study                |
| $\mu_{ia}^{max}$ | Maximum specific ice algal growth rate         | $d^{-1}$                                    | 0.85                  | Lavoie et al. (2005)      |
| $q_{si2n}$       | Intracellular silicon-to-nitrogen ratio        | mol Si: mol N                               | 1.7                   | Mundy et al. (2014)       |
| $r_{pond}$       | Melt pond drainage rate                        | $m d^{-1}$                                  | 0.0175                | Taylor and Feltham (2003) |
| $r_{nit}$        | Nitrification rate constant in sea ice         | $d^{-1}$                                    | 0.01                  | This study                |
| $v_n$            | Scale factor for nitrogen preference function  | $\text{mmol N m}^{-3}$                      | 0.2                   | Denman (2003)             |
| $\nu$            | Kinematic viscosity of seawater                | $m^2 s^{-1}$                                | $1.85 \times 10^{-6}$ | Lavoie et al. (2005)      |
| $z_{ia}$         | Thickness of the ice skeletal layer            | m                                           | 0.03                  | This study                |
| $z_{oc}$         | Thickness of the ocean vertical grid           | m                                           | 1                     |                           |
